# Supplementary material for: Protracted yet coordinated differentiation of long-lived SARS-CoV-2-specific CD8+ T cells during COVID-19 convalescence
Source: PubMed Central journal article supplement (PMC8095211; doi:10.1101/2021.04.28.441880), 2021-04-29

## **SUPPLEMENTAL FIGURE LEGENDS**

### **Figure S1. Nuc<sub>322-331</sub> of SARS-CoV-2 is conserved in the SARS-CoV-2 variants-of-concern.**

Nuc<sub>322-331</sub> resides near the C-terminus of the nucleocapsid protein of SARS-CoV-2, and its sequence, MEVTPSGTWL, is 100% conserved in the B.1.1.7, B.1.351, P.1, and B429/CAL20C first detected in the United Kingdom, South Africa, Brazil, and California, respectively. It is also 100% conserved in SARS-CoV-1, but no orthologs are present in the common cold coronavirus strains 229E, NL63, OC43, and HKU1. Shown are the location of the nucleocapsid gene within the SARS-CoV-2 genome, the location of the sequence encoding the peptide within the nucleocapsid gene, and both the nucleotide and amino acid sequences of corresponding to Nuc<sub>322-331</sub>.

**Figure S2. Expression levels of CyTOF antigens in Nuc<sub>322-331</sub>-specific CD8<sup>+</sup> T cells from PID4103.** The Nuc<sub>322-331</sub>-specific cells were identified either as unstimulated tetramer<sup>+</sup> cells (*red*) or as cells producing IFN $\gamma$  after peptide stimulation (*green*). For each antigen, the histograms represent merges of the five timepoints analyzed in this study.

**Figure S3. Expression levels of CyTOF antigens in Nuc<sub>322-331</sub>-specific CD8<sup>+</sup> T cells from PID4103 as a function of time.**

Line graphs depict the antigens' median staining intensities, as measured by CyTOF, among the tetramer<sup>+</sup> cells in the unstimulated sample (*red*), and the IFN $\gamma$ <sup>+</sup> cells in the Nuc<sub>322-331</sub>-stimulated samples (*green*), at the five timepoints analyzed in this study.

**Figure S4. Approximately half of tetramer<sup>+</sup> cells in Nuc<sub>322-331</sub>-stimulated samples do not secrete IFN $\gamma$  or TNF $\alpha$ .**

PBMCs from PID4103 were stimulated with Nuc<sub>322-331</sub>, stained with HLA-B\*40:01/Nuc<sub>322-331</sub> tetramers, and analyzed by CyTOF. A total of 54.1% of tetramer<sup>+</sup> cells expressed neither IFN $\gamma$  nor TNF $\alpha$ , suggesting that approximately half of tetramer<sup>+</sup> cells are not identified using the cytokine secretion assay.

**Figure S5. Longitudinal assessment of the CD8<sup>+</sup> and CD4<sup>+</sup> T cells of PID4103 directed against the nucleocapsid and spike proteins.**

CD8<sup>+</sup> (A) and CD4<sup>+</sup> (B) T cells specifically responding to stimulation with overlapping peptides spanning the entire nucleocapsid or spike proteins were identified by gating on the IFN $\gamma$ <sup>+</sup> cells. The cells were phenotyped by CyTOF at baseline, or following 4 hours of co-stimulation with  $\alpha$ CD49d/CD28 and either the nucleocapsid or spike peptides. Stimulations were conducted in the presence of brefeldin A to enable detection of intracellular cytokines. Numbers correspond

to the percentage of cells in each sample. Results are gated on live, singlet CD3+CD8+ cells (A) or live, singlet CD3+CD4+ cells (B). Timepoints correspond to days post symptom onset.

## SUPPLEMENTARY TABLES

**Table S1. Tetramers screened by FACS**

| <b>Tetramer ID</b>                      | <b>Epitope</b> | <b>Protein location</b>  | <b>MHC allele</b> |
|-----------------------------------------|----------------|--------------------------|-------------------|
| Nu <sub>C</sub> <sub>322-331</sub> (N1) | MEVTPSGTWL     | Nucleocapsid 322-331     | HLA-B*40:01       |
| N2                                      | LLLDRLNQL      | Nucleocapsid 222-230     | HLA-A*02:01       |
| S1                                      | ALNTLVKQL      | Spike 958-996            | HLA-A*02:01       |
| S2                                      | VLNDILSRL      | Spike 976-984            | HLA-A*02:01       |
| S3                                      | LITGRLQSL      | Spike 996-1004           | HLA-A*02:01       |
| S4                                      | RLNEVAKNL      | Spike 1185-1193          | HLA-A*02:01       |
| S5                                      | NLNESLIDL      | Spike 1192-1200          | HLA-A*02:01       |
| S6                                      | FIAGLIAIV      | Spike 1220-1228          | HLA-A*02:01       |
| M1                                      | HLRIAGHHL      | Membrane Protein 148-156 | HLA-B*08:01       |

**Table S2. Participant Characteristics**

| <b>Patient ID</b> | <b>Gender</b> | <b>Age (years)</b> | <b>Date of symptom onset</b> | <b>Date of First PCR+ test</b> | <b>Date of Blood Draw(s)</b> | <b>Time Between Symptom Onset and analysis</b> | <b>Time Between first PCR+ test and analysis</b> |
|-------------------|---------------|--------------------|------------------------------|--------------------------------|------------------------------|------------------------------------------------|--------------------------------------------------|
| PID4103           | Female        | 42                 | 3/13/20                      | 04/09/20                       | 04/29/20<br>(PCR+)           | 46 days                                        | 20 days                                          |
|                   |               |                    |                              |                                | 05/06/20<br>(PCR-)           | 53 days                                        | 27 days                                          |
|                   |               |                    |                              |                                | 05/20/20<br>(PCR-)           | 67 days                                        | 41 days                                          |
|                   |               |                    |                              |                                | 07/08/20<br>(PCR-)           | 117 days                                       | 90 days                                          |
|                   |               |                    |                              |                                | 10/07/20<br>(PCR-)           | 207 days                                       | 181 days                                         |

**Table S3. List of CyTOF staining antibodies**

| <b>Antibody</b>      | <b>Metal label</b> | <b>Clone</b> | <b>Vendor</b> |
|----------------------|--------------------|--------------|---------------|
| CD49d ( $\alpha 4$ ) | 141Pr              | 9F10         | Fluidigm      |
| CD19                 | 142Nd              | HIB19        | Fluidigm      |
| CCR5                 | 144Nd              | NP6G4        | Fluidigm      |
| CD8                  | 146Nd              | RPAT8        | Fluidigm      |
| CD7                  | 147Sm              | CD76B7       | Fluidigm      |
| ICOS                 | 148Nd              | C398.4A      | Fluidigm      |
| CCR4                 | 149Sm              | L291H4       | Fluidigm      |
| CD62L                | 153Eu              | DREG56       | Fluidigm      |
| TIGIT                | 154Sm              | MBSA43       | Fluidigm      |
| CCR6                 | 155Gd              | G034E3       | In-house      |
| CD29 ( $\beta 1$ )   | 156Gd              | TS2/16       | Fluidigm      |
| OX40                 | 158Gd              | ACT35        | Fluidigm      |
| CCR7                 | 159Tb              | G043H7       | Fluidigm      |
| CD28                 | 160Gd              | CD28.2       | Fluidigm      |
| CD45RO               | 161Dy              | UCHL1        | In-house      |
| CD69                 | 162Dy              | FN50         | Fluidigm      |
| Tetramer             | 163Dy              | N/A          | In-house      |
| PD1                  | 164Dy              | EH12.1       | In-house      |
| CD127                | 165Ho              | A019D5       | Fluidigm      |
| CXCR5                | 166Er              | RF8B2        | In-house      |
| CD27                 | 167Er              | L128         | Fluidigm      |
| CD45RA               | 169Tm              | HI100        | Fluidigm      |
| CD3                  | 170Er              | UCHT1        | Fluidigm      |
| CD57                 | 171Yb              | HCD57        | In-house      |
| CD38                 | 172Yb              | HIT2         | Fluidigm      |
| Tetramer             | 173Yb              | N/A          | In-house      |
| CD4                  | 174Yb              | SK3          | Fluidigm      |
| CD25                 | 176Yb              | M-A251       | In-house      |
| HLADR                | 112Cd              | Tu36         | Invitrogen    |
| NFAT1 <sup>#</sup>   | 143Nd              | D43B1        | Fluidigm      |
| BIRC5 <sup>#</sup>   | 145Nd              | 91630        | In-house      |

|                           |       |            |          |
|---------------------------|-------|------------|----------|
| TNF $\alpha$ <sup>#</sup> | 150Nd | MAb11      | In-house |
| CD107a <sup>#</sup>       | 151Eu | H4A3       | Fluidigm |
| Granzyme B <sup>#</sup>   | 152Sm | O94E6/GZMB | In-house |
| CTLA4 <sup>#</sup>        | 157Gd | 14D3       | In-house |
| IFN $\gamma$ <sup>#</sup> | 168Er | B27        | Fluidigm |
| Perforin <sup>#</sup>     | 175Lu | B-D48      | Fluidigm |
| IL-6 <sup>#</sup>         | 209Bi | MQ2-13A5   | In-house |

<sup>#</sup>*Intracellular antibodies*

Figure S1

SARS-COV-2 whole genome

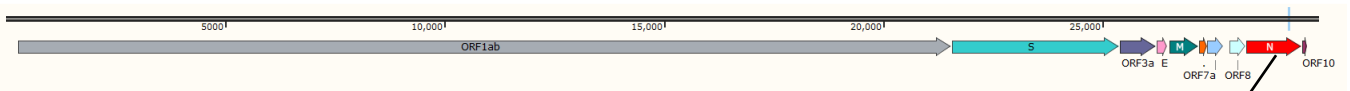

SARS-COV-2 Nucleocapsid

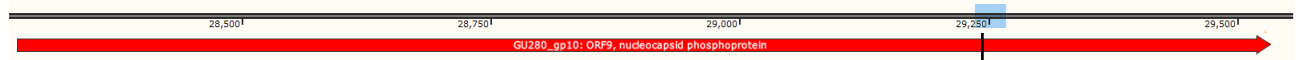

SARS-COV-2 Nucleocapsid peptide

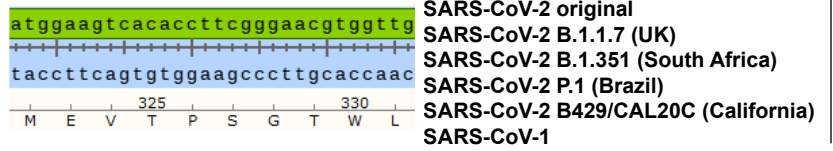

No ortholog: 229E, NL63, OC43, HKU1

Figure S2

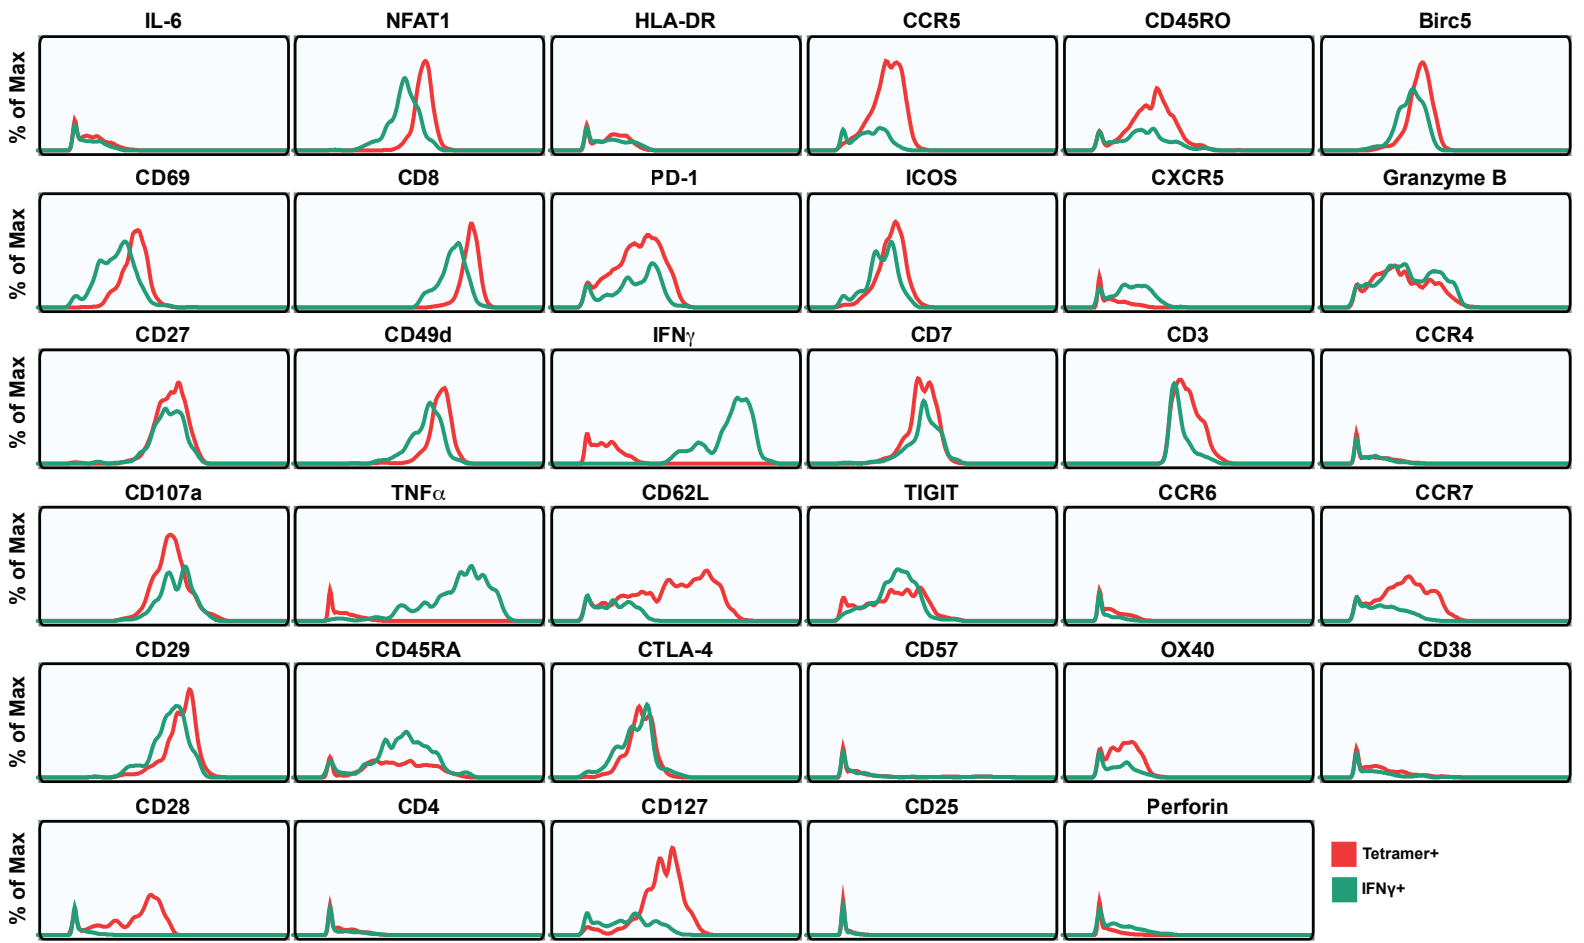



Figure S3

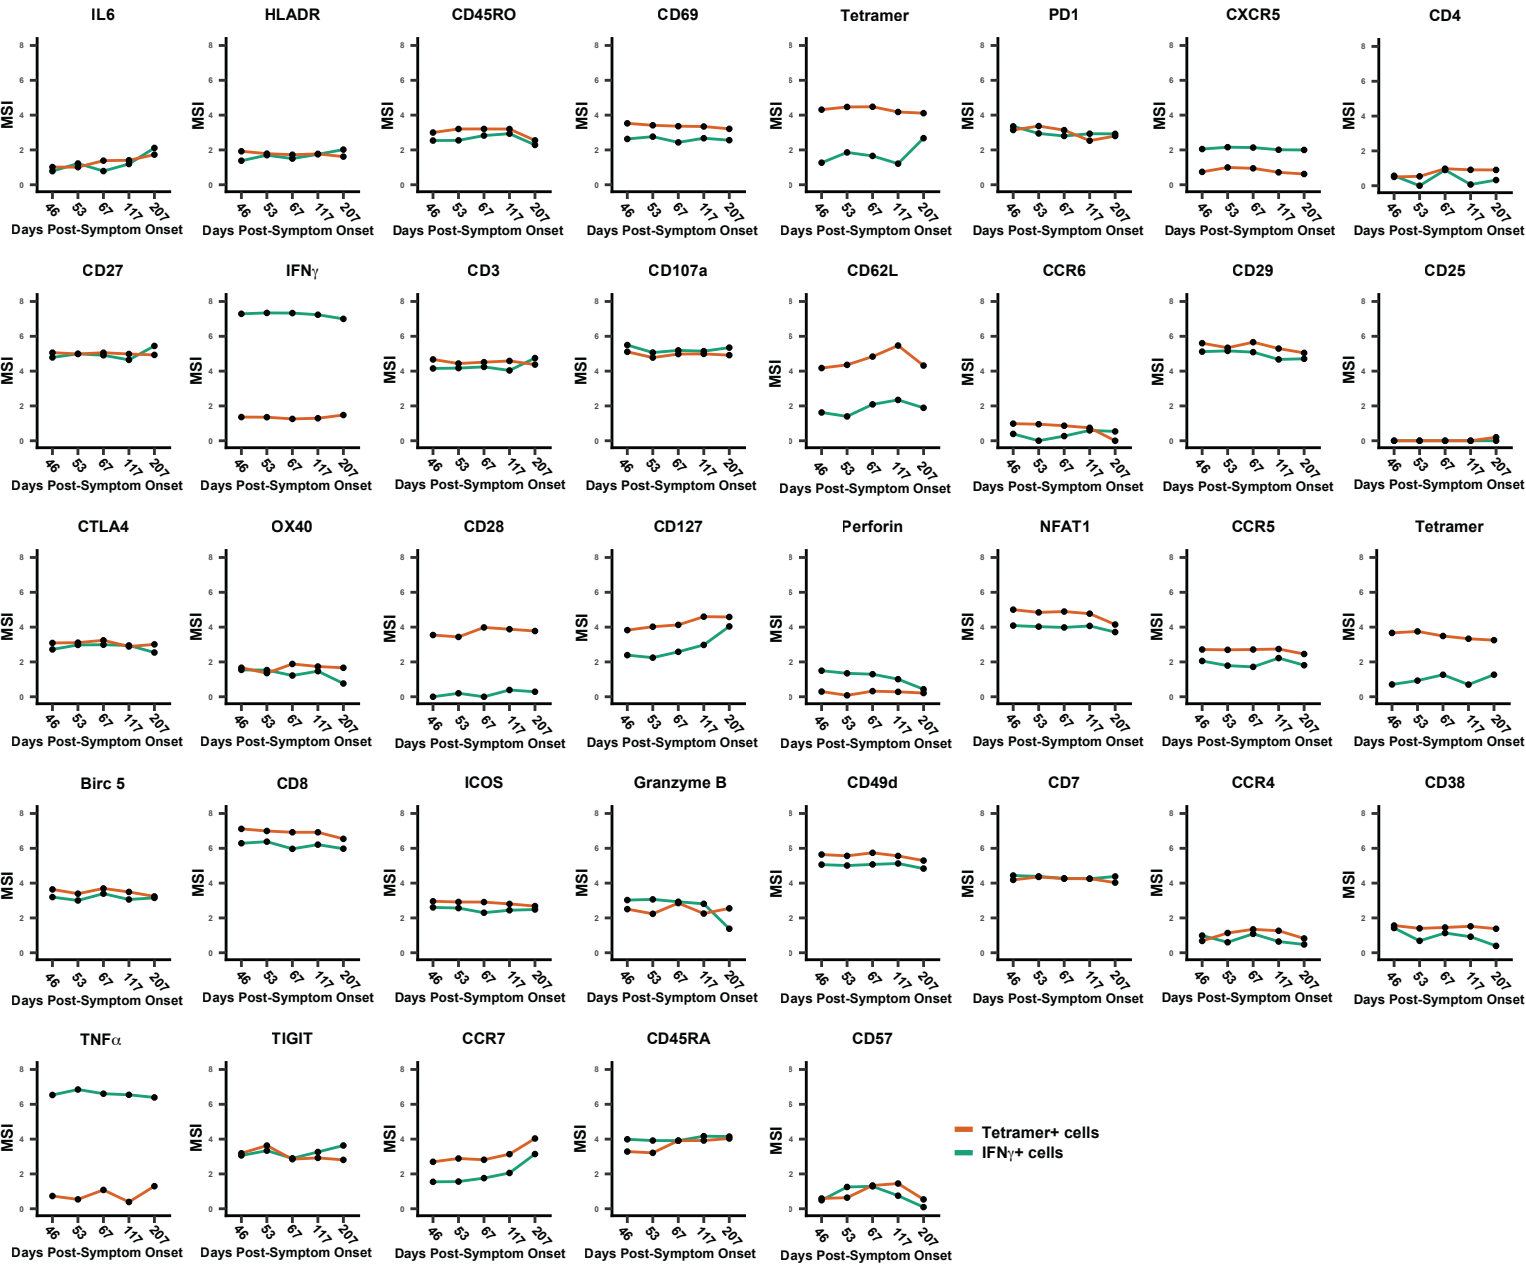

Figure S4

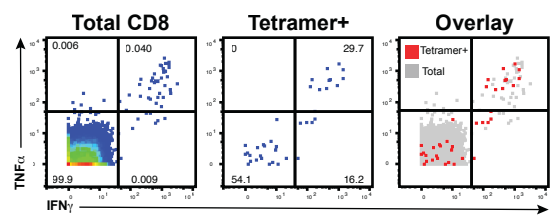

Figure S5

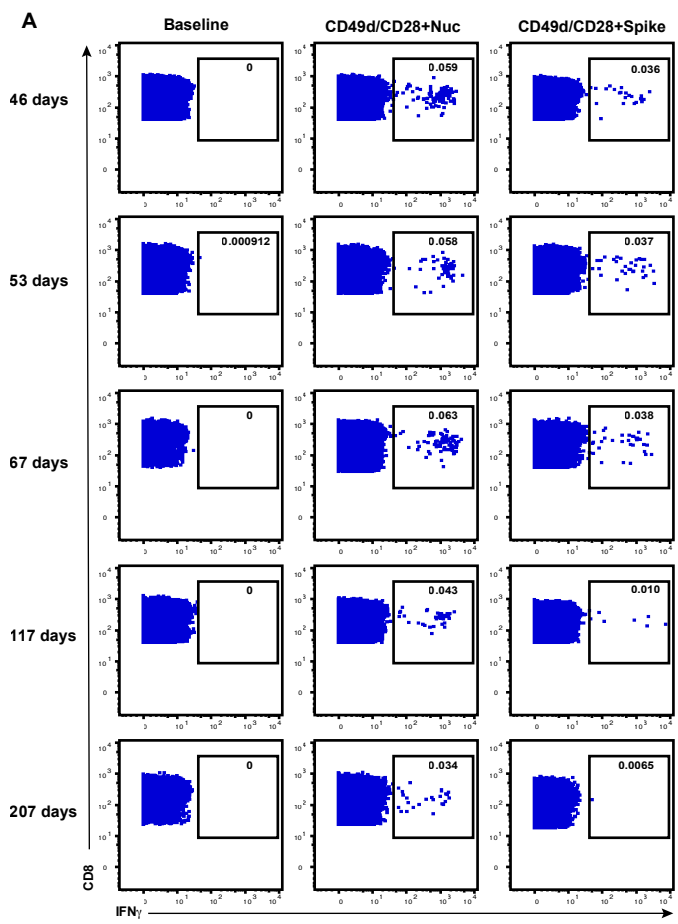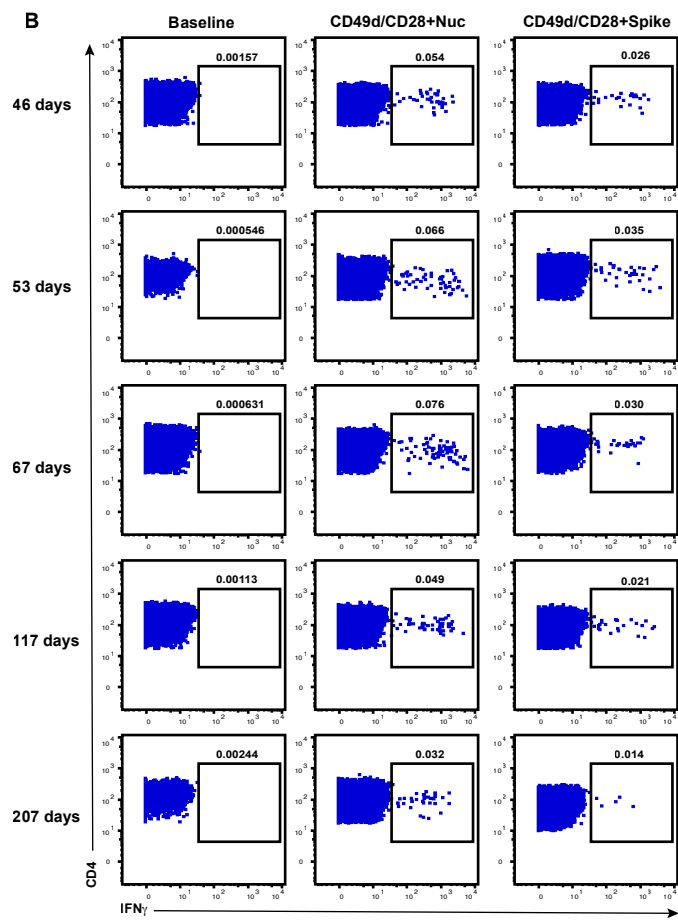

Supplement: NIHPP2021.04.28.441880-supplement-1.pdf [file NIHPP2021.04.28.441880-supplement-1.pdf]
